# Supplementary material for: Genome-wide identification, characterization, and expression analysis of the BTB domain-containing protein gene family in poplar
Source: Research Square preprint supplement (doi:10.21203/rs.3.rs-4698496/v1), 2024-07-31
Supplement: Supplementary file 1 [file 132e7c15d737de28055e3b7e.xlsx]

## Sheet: Sheet1
Gene	Forward Primer	Reverse Primer
18s	TTAACGAGGATCCATTGGAGGGCA	ACCCAACCCAAAGTCCAACTACGA
PaBTB7	GGAGAGCTGCCCTTCAATGT	CAGTCGCTAAATCGAGCCCA
PaBTB17	CTCCCAGTCTTCTACCTCTCC	GACCTCTCTTGCGGAGAACA
PaBTB27	AAGAAAGGAGCTCCAGTGCC	GAGTTGGTCCCACAAGTCCC
PaBTB36	GAAACGGTCTCACCAGCAGA	TGGAGGCACCGTTAAAAGCA
PaBTB44	GGCTAGTGATGACCTGCGAA	GACAAGATGCTGGGCCTGAT
PaBTB65	CGGCTGAGTACCTGGGAATG	GCCTTTGCAGCTATGGCATC
PaBTB89	TGTCCGACTCCGAACACAAG	CCAGTTCTCAGAAAGGCGGT
