# Supplementary material for: Genome-wide identification, characterization, and expression analysis of the BTB domain-containing protein gene family in poplar
Source: Research Square preprint supplement (doi:10.21203/rs.3.rs-4698496/v1), 2024-07-31
Supplement: Supplementary file 2 [file 79bde3661730c7a2a66c3a6e.xlsx]

## Sheet: Sheet1
Gene Name	3-AF1 binding site	3-AF3 binding site	4cl-CMA2b	AAAC-motif	AACA_motif	AAGAA-motif	A-box	ABRE	ABRE3a	ABRE4	ACA-motif	ACE	AC-I	AC-II	ACTCATCCT sequence	AE-box	AP-1	ARE	as-1	AT~ABRE	AT~TATA-box	AT1-motif	ATC-motif	ATCT-motif	AT-rich element	AT-rich sequence	AuxRR-core	Box 4	Box 5	Box II	Box II -like sequence	Box III	box S	CAAT-box	CAG-motif	CARE	CAT-box	CCAAT-box	CCGTCC motif	CCGTCC-box	CGTCA-motif	chs-CMA1a	chs-CMA2a	chs-Unit 1 m1	circadian	CTAG-motif	dOCT	DRE	DRE core
PaBTB1						2												1	2		3	2						6						41							2						1
PaBTB2						3		1										5	1		10	2			1			3						29				1			1
PaBTB3						1		1	1	1				1				1	1		5			1				6						35			1				1
PaBTB4						2										1		3			2	1				1		5						27			2	1
PaBTB5						3		2	1	1								3	2		5	2						3						42			1				2	1	1
PaBTB6								2								1		1			10	1						2						36				1			1
PaBTB7	1							8	1	1						1		1	1		6							5						30				1			1
PaBTB8							1	3	1	1											6							6						24			2	1	2	2
PaBTB9						2		1					1					2			1							3					1	46		1
PaBTB10								4	2	2						1		4			1					1		2		1				38
PaBTB11					1			2								1		2								1		5						25			1	1									1
PaBTB12							1	2											2		11													35					1	1	2
PaBTB13				1	1	2		1	1	1						2		1	2		12	1		1				1		2				28			1	1			2
PaBTB14								4										2			3			1	1			4						25				1
PaBTB15	1							5	1	2						1		2										3				1		35									1
PaBTB16						1		7	1	1								2				1		1				4		1			1	44				2					1
PaBTB17						2		1										4	3		30			1										25			2				3	1
PaBTB18								1							1			3				1		1	1			3						35			1	1				1
PaBTB19								1										4	1		20	1		2				2						36							1	1
PaBTB20						2		1													7	1					1						1	34
PaBTB21						1										2		2	1		30	1			1			4						48			1				1
PaBTB22								1	1	1						1	1	2	1		1													37			1				1		1
PaBTB23																		6			4							4						35	1
PaBTB24						1	1	1										1			5						1	2					1	36	1			1	1	1
PaBTB25						2		1			1							7	1						1			2					1	22				1			1
PaBTB26						3		1	1	1						2		3			4				1			6						35			1
PaBTB27						5		3	1	1						1		6	2		2							1						41				1			2						1
PaBTB28						2		1										4			2			1	2		1	2						44															1
PaBTB29						3		1								2		3			2		1	1				1						34											1
PaBTB30						2												2	3		22							3					1	45				1			3
PaBTB31																		3			1	2			1			4						37
PaBTB32				1		3												4			2		1					2				1		42			1
PaBTB33						1		1								1		4			5	1			1			1						35
PaBTB34																1		4			3				1			6						31							1
PaBTB35	1							3	1	1								1			12				1	1		4						48							2
PaBTB36								3													2	1						3						40							2				1
PaBTB37								6	1	1								2			6		1	1				2			1			45			1					1			1
PaBTB38						1	1									2	1				2				3			2						39					1	1						1
PaBTB39								2										3			3	1		2				3				1	1	36															1
PaBTB40																		3			2	2		2				4				1		41							1
PaBTB41								2	2	2								5			3	1						4						29							2				1
PaBTB42						3		5	1	1						1		4	2		3			1				4			1			35							2				1
PaBTB43							1	2										3			30	2		2	1			3						36			1		1	1	1
PaBTB44								2	1	1		1				1		3		1	1							2						36		1	2				2
PaBTB45						3		5										3	2		16			1				2						38							4		1
PaBTB46						3		5										3	4		21							2						38							4		1
PaBTB47								4	1	1						1		3	4			2						1						37							4	1
PaBTB48								3										4			1		1					5						28			1
PaBTB49						3	1				1								2		5		1		1	1	1	6					2	43					1	1	2				1		1
PaBTB50						3												3	1		24				1			4						28							1
PaBTB51				1				2								2		1			31				1		1	8						28							1		1
PaBTB52								1										1			6				1			2						43		2		1			2	1
PaBTB53								1	1	1						1		1			4							5						49
PaBTB54						1		2	2	2								3			3	1			1	1	1							32		1						1
PaBTB55						1										1	1	7	1		3				1			1						38							1					1
PaBTB56						2		5			1					1		1	2		3							5						24				1			2								1
PaBTB57							2	3	1	1								3	1								1						1	28				2	2	2	1				1
PaBTB58						3												2	1		2			2				4						39							1	1			1
PaBTB59			1			3		1	1	1		1	1			1		2	2		7		1					1						26			1				2		1		1	1
PaBTB60				1				2				1				1		3			3						1	3						37							3
PaBTB61								4	1	1		1						1		1	9		1					1						24			1				2
PaBTB62								1								1		3							1		1	3		1				32
PaBTB63																		3			16			1			1	4						29		1					2
PaBTB64		1						2				1		1	2			2			14				1			3						21							1
PaBTB65																1		4			24			1				2	1					29														1
PaBTB66									2	2						1					24							5						38									1
PaBTB67							1	4								1					20							2		1				49			2		1	1	1				1
PaBTB68								2													7			1		2		2						30							1
PaBTB69	1			1				3								1		4							1			5						29							2
PaBTB70							1	1										2										4			1			26					1	1	3
PaBTB71	1							1										1			5	1				1		7						39				1			1	1
PaBTB72																		3			9							5						34
PaBTB73																1		2			4	1			1			2						27
PaBTB74								3								1					3	1						2						34							3
PaBTB75																1		2			1	1		1				4						36							1
PaBTB76								1								1		3			2	2		1	1			4						24							5			1
PaBTB77																		6			1				1			5						23							2
PaBTB78								1	1	1						1		2			4	1			1	1		2						36			1
PaBTB79								6										4			1				1		1	5						33			1
PaBTB80																1					13			1				3						26		1	1	1			2
PaBTB81								4	1	1						1		4																30			2	1			4
PaBTB82							2	3	1	1						1		3	1		2						1						1	26				2	2	2	1
PaBTB83						1										2		4	1		6					1		5						47				1			1
PaBTB84						2										2	1	4	2															30			3	1			2
PaBTB85						1						1				1		1	1		1						1	2						31							1					1
PaBTB86								1								2		2			5							2						34			1						1
PaBTB87						2		3	1	1				1				4			5							2						31			1								1
PaBTB88						2	1											4			1						1	4						36			2		1	1
PaBTB89						4		1	1	1						2	1	4	1		9	1		1				2						34	1						1						1
[truncated: 54 more columns]
