# Supplementary material for: Genome-wide identification, characterization, and expression analysis of the BTB domain-containing protein gene family in poplar
Source: Research Square preprint supplement (doi:10.21203/rs.3.rs-4698496/v1), 2024-07-31
Supplement: Supplementary file 3 [file 9b00ac4eeecc500261e61e6c.xlsx]

## Sheet: Sheet1
Gene Name	Protein ID
PtBTB1	Potri.019G039500.1.v4.1
PtBTB2	Potri.009G156500.1.v4.1
PtBTB3	Potri.004G194200.1.v4.1
PtBTB4	Potri.010G029500.1.v4.1
PtBTB5	Potri.008G200700.1.v4.1
PtBTB6	Potri.008G059600.1.v4.1
PtBTB7	Potri.010G199200.1.v4.1
PtBTB8	Potri.002G052700.2.v4.1
PtBTB9	Potri.005G210000.1.v4.1
PtBTB10	Potri.010G090900.10.v4.1
PtBTB11	Potri.008G150100.1.v4.1
PtBTB12	Potri.010G014000.1.v4.1
PtBTB13	Potri.016G123800.5.v4.1
PtBTB14	Potri.006G103400.3.v4.1
PtBTB15	Potri.001G280100.4.v4.1
PtBTB16	Potri.009G075300.1.v4.1
PtBTB17	Potri.005G214400.1.v4.1
PtBTB18	Potri.002G048300.1.v4.1
PtBTB18.1	Potri.010G170900.1.v4.1
PtBTB19	Potri.019G038400.2.v4.1
PtBTB20	Potri.013G062500.5.v4.1
PtBTB21	Potri.001G102300.1.v4.1
PtBTB21.1	Potri.001G100900.1.v4.1
PtBTB21.2	Potri.003G131000.1.v4.1
PtBTB22	Potri.003G129300.1.v4.1
PtBTB22.1	Potri.012G091400.1.v4.1
PtBTB22.2	Potri.013G024400.1.v4.1
PtBTB22.3	Potri.008G085500.1.v4.1
PtBTB23	Potri.006G185300.1.v4.1
PtBTB24	Potri.018G107600.1.v4.1
PtBTB25	Potri.016G112900.1.v4.1
PtBTB26	Potri.015G087700.1.v4.1
PtBTB26.1	Potri.007G032800.1.v4.1
PtBTB27	Potri.007G055100.1.v4.1
PtBTB27.1	Potri.001G184200.3.v4.1
PtBTB28	Potri.007G140400.1.v4.1
PtBTB29	Potri.017G009700.1.v4.1
PtBTB30	Potri.005G183600.1.v4.1
PtBTB31	Potri.002G077000.1.v4.1
PtBTB32	Potri.001G468700.2.v4.1
PtBTB33	Potri.005G178400.1.v4.1
PtBTB34	Potri.002G082800.1.v4.1
PtBTB35	Potri.013G083800.2.v4.1
PtBTB35.1	Potri.012G118300.4.v4.1
PtBTB36	Potri.014G163200.2.v4.1
PtBTB37	Potri.014G093700.1.v4.1
PtBTB38	Potri.002G166700.2.v4.1
PtBTB39	Potri.001G096100.1.v4.1
PtBTB40	Potri.003G135300.1.v4.1
PtBTB40.1	Potri.001G457550.1.v4.1
PtBTB42	Potri.005G251300.1.v4.1
PtBTB43	Potri.002G010100.1.v4.1
PtBTB44	Potri.006G148100.1.v4.1
PtBTB47	Potri.012G118500.1.v4.1
PtBTB47.1	Potri.015G117200.2.v4.1
PtBTB48	Potri.002G056500.1.v4.1
PtBTB49	Potri.005G206100.2.v4.1
PtBTB50	Potri.016G040500.1.v4.1
PtBTB51	Potri.006G043400.2.v4.1
PtBTB52	Potri.005G149400.2.v4.1
PtBTB54	Potri.002G209700.1.v4.1
PtBTB55	Potri.007G053200.2.v4.1
PtBTB56	Potri.016G139900.1.v4.1
PtBTB58	Potri.019G131600.1.v4.1
PtBTB59	Potri.013G159000.5.v4.1
PtBTB59.1	Potri.001G255950.1.v4.1
PtBTB60	Potri.006G003000.1.v4.1
PtBTB60.1	Potri.016G003700.2.v4.1
PtBTB62	Potri.010G046800.3.v4.1
PtBTB63	Potri.008G186100.7.v4.1
PtBTB64	Potri.009G089500.1.v4.1
PtBTB65	Potri.001G295600.3.v4.1
PtBTB66	Potri.005G146400.2.v4.1
PtBTB67	Potri.018G018600.2.v4.1
PtBTB68	Potri.006G264300.2.v4.1
PtBTB69	Potri.007G093000.1.v4.1
PtBTB71	Potri.007G112600.1.v4.1
PtBTB72	Potri.017G048200.1.v4.1
PtBTB73	Potri.016G090400.1.v4.1
PtBTB74	Potri.008G038600.1.v4.1
PtBTB74.1	Potri.010G223600.1.v4.1
PtBTB76	Potri.001G357100.1.v4.1
PtBTB77	Potri.011G091100.1.v4.1
PtBTB78	Potri.007G033900.1.v4.1
PtBTB79	Potri.005G130700.5.v4.1
PtBTB80	Potri.004G189800.1.v4.1
PtBTB81	Potri.009G150500.1.v4.1
PtBTB82	Potri.013G073700.1.v4.1
PtBTB86	Potri.017G041600.1.v4.1
PtBTB86.1	Potri.011G032100.1.v4.1
PtBTB86.2	Potri.004G030600.1.v4.1
PtBTB87	Potri.007G118800.1.v4.1
PtBTB88	Potri.014G164000.1.v4.1
PtBTB89	Potri.006G202900.6.v4.1
