# Supplementary material for: Genome-wide identification, characterization, and expression analysis of the BTB domain-containing protein gene family in poplar
Source: Research Square preprint supplement (doi:10.21203/rs.3.rs-4698496/v1), 2024-07-31
Supplement: Supplementary file 4 [file be292d0dbbd4c983f08f5b95.xlsx]

## Sheet: Sheet2
A1	A2	A3	B1	B2	B3	B4	C1	C2	C3	C4	D	E1	E2	E3	E4	F	G	H
Os04g56460	Os03g57854	Os09g16850	Os05g33050	Os07g08120	Os03g06160	Os04g42310	Os04g40630	Os07g15490	Os08g01320	Os11g02070	Os06g21330	Os02g16000	At1g04390	Os05g27880	Os01g72020	Os03g41350	Os01g70670	Os07g47260
Os10g29020	Os07g07270	Os09g16870	At5g13060	Os11g37520	Os10g30190	Os02g39910	Os10g29060	At4g08455	Os08g38700	Os12g02030	At2g04740	Os06g31100	PaBTB41	At2g30600	Os11g04600	Os12g39380		Os06g03840
Os10g29050	Os07g01140		At5g19330	Os03g18360	At5g55000	Os03g15800	Os02g38320	PaBTB30	At1g21780	At1g01640	PaBTB36	At4g01160		PaBTB42	Os12g04410	Os03g10800		Os04g20920
Os10g28990	Os07g46160		PaBTB8	At4g02680	PaBTB19	Os07g23720	Os10g68020	PaBTB31	At1g55760	At3g56230	PtBTB36	At2g46260		PaBTB43	Os01g09800	Os06g08550		Os07g15600
Os10g28810	At3g43700		PaBTB9	At3g51770	PaBTB20	At2g24240	Os01g66890	PtBTB30	PaBTB32	At3g29740		At3g61600		PtBTB42	Os03g46440	Os09g25330		Os12g08720
Os10g28860	At5g21010		PaBTB10	At5g58550	PtBTB19	At4g30940	At3g48360	PtBTB31	PaBTB33	At2g40450		PaBTB37		PtBTB43	Os01g56200	Os02g38120		Os04g49060
Os11g40220	At3g03740		PaBTB11	PaBTB13	PtBTB20	At5g41330	At5g63160		PaBTB34	At2g40440		PaBTB38			At2g41370	Os04g40100		Os03g55950
Os11g41290	At2g39760		PaBTB12	PaBTB14		At3g09030	At4g37610		PtBTB32	At4g04090		PaBTB39			At3g57130	Os09g09370		Os07g03150
Os11g41310	At3g06190		PtBTB8	PaBTB15		PaBTB21	At5g67480		PtBTB33	At5g48510		PaBTB40			At1g64280	Os02g35970		Os12g40480
Os11g41260	At5g19000		PtBTB9	PaBTB16		PaBTB22	At1g05690		PtBTB34	At2g05330		PtBTB37			At4g26120	Os01g57230		At3g05675
Os11g41300	PaBTB1		PtBTB10	PaBTB17		PaBTB23	PaBTB26			PaBTB35		PtBTB38			At4g19660	Os04g54400		At2g13690
Os11g41350	PaBTB2		PtBTB11	PaBTB18		PaBTB24	PaBTB27			PtBTB35		PtBTB39			At5g45110	Os03g43990		At1g63850
Os10g28820	PaBTB3		PtBTB12	PtBTB13		PaBTB25	PaBTB28			PtBTB35.1		PtBTB40			PaBTB44	Os12g41910		At5g60050
Os11g45560	PaBTB4			PtBTB14		PtBTB21	PaBTB29					PtBTB40.1			PaBTB45	Os08g03650		At3g50780
Os11g40490	PaBTB5			PtBTB15		PtBTB21.1	PtBTB26								PaBTB46	Os03g55830		PaBTB89
Os11g40670	PaBTB6			PtBTB16		PtBTB21.2	PtBTB26.1								PaBTB47	Os07g39530		PtBTB89
Os11g40680	PaBTB7			PtBTB17		PtBTB22	PtBTB27								PaBTB48	Os03g52880
Os04g35310	PtBTB1			PtBTB18		PtBTB22.1	PtBTB27.1								PaBTB49	Os11g02610
Os04g35340	PtBTB2			PtBTB18.1		PtBTB22.2	PtBTB28								PaBTB50	Os05g11190
Os04g35370	PtBTB3					PtBTB22.3	PtBTB29								PaBTB51	Os12g02530
Os10g29501	PtBTB4					PtBTB23									PtBTB44	Os03g10880
Os10g29380	PtBTB5					PtBTB24									PtBTB47	Os03g22600
Os10g29790	PtBTB6					PtBTB25									PtBTB47.1	Os11g02620
Os10g29810	PtBTB7														PtBTB48	Os12g02540
Os10g29740															PtBTB49	Os07g36230
Os10g29850															PtBTB50	Os04g57800
Os10g29750															PtBTB51	At2g23050
Os10g29840																At4g37590
Os02g20590																At5g67440
Os02g20720																At2g14820
Os02g52313																At4g31820
Os05g44540																At1g67900
Os10g28980																At3g26490
Os10g28870																At5g47800
Os10g28970																At5g64330
Os05g44530																At5g13600
Os10g29410																At3g49900
Os10g29100																At5g03250
Os10g29150																At1g30440
Os10g29110																At3g44820
Os10g29220																At5g10250
Os10g29310																At3g50840
Os10g29290																At5g66560
Os10g29180																At5g48130
Os10g29230																At2g30520
Os06g14060																At3g49970
Os06g45730																At5g67385
Os10g28790																At2g47860
Os10g28760																At1g03010
Os10g28780																At3g08570
Os10g28770																At3g08660
Os08g13060																At5g48800
Os08g13070																At3g22104
Os08g13000																At1g50280
Os08g13030																At3g19850
Os08g13180																At3g03510
Os08g03500																At5g17580
Os08g03510																PaBTB52
Os08g03530																PaBTB70
Os04g53390																PaBTB72
Os08g25240																PaBTB82
Os08g03480																PaBTB61
Os11g24550																PaBTB84
Os08g41240																PaBTB77
Os08g41190																PaBTB60
Os08g41230																PaBTB63
Os08g41150																PaBTB87
Os08g41180																PaBTB71
Os08g41120																PaBTB88
Os08g40460																PaBTB53
Os04g53400																PaBTB85
Os04g53410																PaBTB69
Os04g53430																PaBTB58
Os08g03470																PaBTB62
Os08g31430																PaBTB81
Os08g31450																PaBTB66
Os08g31420																PaBTB75
																PaBTB56
																PaBTB55
																PaBTB79
																PaBTB57
																PaBTB68
																PaBTB67
																PaBTB74
																PaBTB59
																PaBTB86
																PaBTB65
																PaBTB83
																PaBTB76
																PaBTB64
																PaBTB73
																PaBTB80
																PaBTB54
																PaBTB78
																PtBTB52
																PtBTB54
																PtBTB55
																PtBTB56
																PtBTB58
																PtBTB59
																PtBTB59.1
																PtBTB60
																PtBTB60.1
																PtBTB62
																PtBTB63
																PtBTB64
																PtBTB65
																PtBTB66
																PtBTB67
																PtBTB68
																PtBTB69
																PtBTB71
																PtBTB72
																PtBTB73
																PtBTB74
																PtBTB74.1
																PtBTB76
																PtBTB77
																PtBTB78
																PtBTB79
																PtBTB80
																PtBTB81
																PtBTB82
																PtBTB86
																PtBTB86.1
																PtBTB86.2
																PtBTB87
																PtBTB88
